# Supplementary material
Source: HighWire-hosted journal article supplement (https://erj.ersjournals.com/content/59/3/2102102)

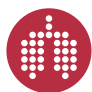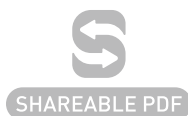

# *In vivo* microevolution of *Mycobacterium tuberculosis* and transient emergence of *atpE*\_Ala63Pro mutation during treatment in a pre-XDR TB patient

Arash Ghodousi<sup>1,2</sup>, Alamdar Hussain Rizvi<sup>3</sup>, Faisal Masood Khanzada<sup>3</sup>, Nasim Akhtar<sup>4,5</sup>, Abdul Ghafoor<sup>4</sup>, Alberto Trovato<sup>2</sup>, Daniela Maria Cirillo <sup>1,2</sup> and Sabira Tahseen <sup>3</sup>

<sup>1</sup>Vita-Salute San Raffaele University, Milan, Italy. <sup>2</sup>IRCCS San Raffaele Scientific Institute, Milan, Italy. <sup>3</sup>National TB Reference Laboratory, National Tuberculosis Control Program, Islamabad, Pakistan. <sup>4</sup>National Tuberculosis Control Program, Islamabad, Pakistan. <sup>5</sup>Pakistan Institute of Medical sciences, Islamabad, Pakistan.

Corresponding author: Sabira Tahseen ([sabira.tahseen@gmail.com](mailto:sabira.tahseen@gmail.com))

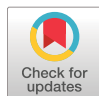

Shareable abstract (@ERSpublications)

This letter describes microevolution of a pre-XDR MTB strain isolated from a pulmonary TB patient over an 18-month exposure to BDQ. MDR-TB therapies with BDQ require a functional background regimen to prevent emergence of additional resistance. <https://bit.ly/3D05qT9>

**Cite this article as:** Ghodousi A, Hussain Rizvi A, Khanzada FM, *et al.* *In vivo* microevolution of *Mycobacterium tuberculosis* and transient emergence of *atpE*\_Ala63Pro mutation during treatment in a pre-XDR TB patient. *Eur Respir J* 2022; 59: 2102102 [DOI: 10.1183/13993003.02102-2021].

This single-page version can be shared freely online.

Copyright ©The authors 2022.

This version is distributed under the terms of the Creative Commons Attribution Non-Commercial Licence 4.0. For commercial reproduction rights and permissions contact [permissions@ersnet.org](mailto:permissions@ersnet.org)

This article has an editorial commentary:  
<https://doi.org/10.1183/13993003.00149-2022>

Received: 28 July 2021  
Accepted: 4 Nov 2021

*To the Editor:*

Bedaquiline is a novel anti-tuberculosis drug for the treatment of multidrug-resistant tuberculosis (MDR-TB) recommended by the World Health Organization (WHO) [1] and recently upgraded to the group A classification of TB drugs as one of the three key drugs, along with linezolid and fluoroquinolones, to be included in all MDR-TB treatment regimens. Based on this grouping of second-line drugs, extensively drug-resistant tuberculosis (XDR-TB) is redefined as MDR- or rifampicin-resistant-TB that is resistant to a fluoroquinolone and to either bedaquiline or linezolid or both. Moreover, bedaquiline, in combination with pretomanid and linezolid, is a part of BPpL regimen recommended for treating adult pulmonary TB patients having pre-XDR-TB or MDR-TB which is either non-responsive or intolerant to recommended standard treatment [2]. However, globally emerging resistance to bedaquiline threatens the effectiveness of novel treatment regimens for drug-resistant TB.

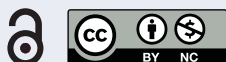

Supplement: inline-supplementary-material-1 [file inline-supplementary-material-1.pdf]
